# Supplementary material
Source: Springer Nature journal article supplement (https://www.springermedizin.de/resource/supplementary/12936_2013_3028_MOESM5_ESM.pdf/9544880)

**A****FC27**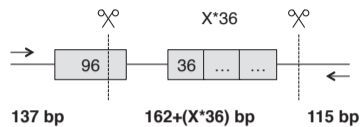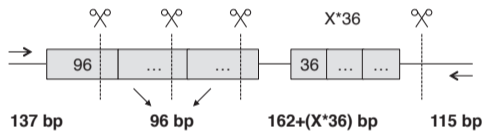**B****3D7**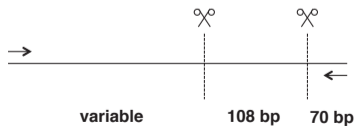**C**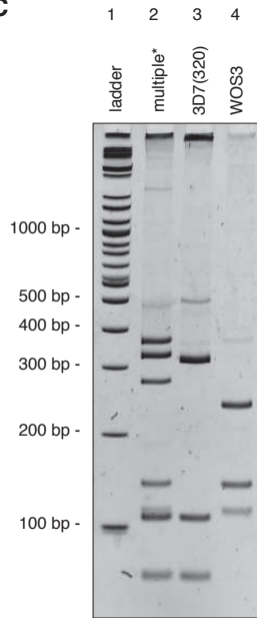

\* WOS12, 3D7(330), 3D7(370)

**D**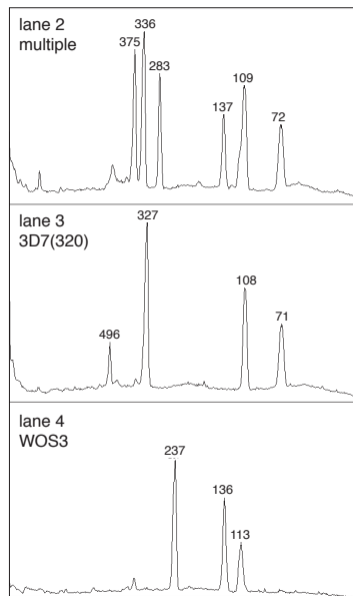

Supplement: MOESM5 [file 9544880]
